# Supplementary material for: Neutral fabrication of UV-blocking and antioxidation lignin-stabilized high internal phase emulsion encapsulates for high efficient antibacterium of natural curcumin
Source: Royal Society of Chemistry journal article supplement (doi:10.1039/c9fo00320g), 2019-01-01
Supplement: c9fo00320g1.pdf [file c9fo00320g1.pdf]

## Electronic Supplementary Information

### **Neutral fabrication of UV-blocking and antioxidation lignin-stabilized high internal phase emulsion encapsulates for high efficient antibacterium of natural curcumin**

*Kai Chen<sup>a</sup>, Yong Qian<sup>\*a</sup>, Senyi Wu<sup>a</sup>, Xueqing Qiu<sup>\*a</sup>, Dongjie Yang<sup>a</sup>, Lei Lei<sup>\*b</sup>*

*<sup>a</sup> School of Chemistry and Chemical Engineering, Guangdong Engineering Research Center for Green Fine Chemicals, South China University of Technology, Guangzhou 510640, China*

*<sup>b</sup> School of Chemical Engineering, The University of New South Wales, Sydney, NSW 2052, Australia. E-mail: lei.lei@unsw.edu.au (L. Lei).*

*E-mail: ceyqian@scut.edu.cn (Y. Qian), xueqingqiu66@163.com (X.Q. Qiu), lei.lei@unsw.edu.au (L. Lei).*

*It Includes 16 Pages, 5 Tables, 8 Figures.*

**Table S1** The reaction condition and yield of sulfomethylating modification of EHL

| <b>EHL (g)</b> | <b>Water (mL)</b> | <b>pH</b> | <b>37% HCHO wt%</b> | <b>Na<sub>2</sub>SO<sub>3</sub> wt%</b> | <b>Yield (%)</b> |
|----------------|-------------------|-----------|---------------------|-----------------------------------------|------------------|
| 6.0            | 40                | 12.0      | 15                  | 5                                       | 48.3%            |
| 6.0            | 40                | 12.0      | 15                  | 10                                      | 56.7%            |
| 6.0            | 40                | 12.0      | 15                  | 20                                      | 61.7%            |
| 6.0            | 40                | 12.0      | 15                  | 40                                      | 66.7%            |
| 6.0            | 40                | 12.0      | 15                  | 60                                      | 83.3%            |

**Table S2** Experimental factors & levels for HIPEs stabilized with lignin derivatives.

| Samples  | Lignin derivatives | Lignin content | APG | Oil  |
|----------|--------------------|----------------|-----|------|
|          |                    | wt%            | wt% | vol% |
| HIPEs-1  |                    | 0.5            | 3.5 | 80.0 |
| HIPEs-2  |                    | 1.0            | 3.5 | 80.0 |
| HIPEs-3  | EHL-5S             | 2.0            | 3.5 | 80.0 |
| HIPEs-4  |                    | 3.0            | 3.5 | 80.0 |
| HIPEs-5  |                    | 5.0            | 3.5 | 80.0 |
| HIPEs-6  |                    | 0.5            | 3.5 | 80.0 |
| HIPEs-7  |                    | 1.0            | 3.5 | 80.0 |
| HIPEs-8  | EHL-10S            | 2.0            | 3.5 | 80.0 |
| HIPEs-9  |                    | 3.0            | 3.5 | 80.0 |
| HIPEs-10 |                    | 5.0            | 3.5 | 80.0 |
| HIPEs-11 |                    | 0.5            | 3.5 | 80.0 |
| HIPEs-12 |                    | 1.0            | 3.5 | 80.0 |
| HIPEs-13 | EHL-20S            | 2.0            | 3.5 | 80.0 |
| HIPEs-14 |                    | 3.0            | 3.5 | 80.0 |
| HIPEs-15 |                    | 5.0            | 3.5 | 80.0 |
| HIPEs-16 |                    | 0.5            | 3.5 | 80.0 |
| HIPEs-17 |                    | 1.0            | 3.5 | 80.0 |
| HIPEs-18 | EHL-40S            | 2.0            | 3.5 | 80.0 |
| HIPEs-19 |                    | 3.0            | 3.5 | 80.0 |
| HIPEs-20 |                    | 5.0            | 3.5 | 80.0 |
| HIPEs-21 |                    | 0.5            | 3.5 | 80.0 |
| HIPEs-22 |                    | 1.0            | 3.5 | 80.0 |
| HIPEs-23 | EHL-40S            | 2.0            | 3.5 | 80.0 |
| HIPEs-24 |                    | 3.0            | 3.5 | 80.0 |

|          |         |     |     |      |
|----------|---------|-----|-----|------|
| HIPEs-25 |         | 5.0 | 3.5 | 80.0 |
| HIPEs-26 |         | 0.5 | 3.5 | 80.0 |
| HIPEs-27 |         | 1.0 | 3.5 | 80.0 |
| HIPEs-28 | EHL-60S | 2.0 | 3.5 | 80.0 |
| HIPEs-29 |         | 3.0 | 3.5 | 80.0 |
| HIPEs-30 |         | 5.0 | 3.5 | 80.0 |
| HIPEs-31 |         | 0.5 | 3.5 | 80.0 |
| HIPEs-32 |         | 1.0 | 3.5 | 80.0 |
| HIPEs-33 | LS      | 2.0 | 3.5 | 80.0 |
| HIPEs-34 |         | 3.0 | 3.5 | 80.0 |
| HIPEs-35 |         | 5.0 | 3.5 | 80.0 |
| HIPEs-36 |         | 2.0 | 3.5 | 75.0 |
| HIPEs-37 | EHL-20S | 2.0 | 3.5 | 78.0 |
| HIPEs-38 |         | 2.0 | 3.5 | 82.0 |

---

**Table S3** Physicochemical parameters of EHL, EHL-XS and LS

| Samples | M <sub>w</sub><br>(Da) | M <sub>n</sub><br>(Da) | PDI  | Water<br>solubility | Ph-OH<br>(mmol/g) | -COOH<br>(mmol/g) | -SO <sub>3</sub> <sup>-</sup><br>(mmol/g) |
|---------|------------------------|------------------------|------|---------------------|-------------------|-------------------|-------------------------------------------|
| EHL     | 3100                   | 1100                   | 2.82 | –                   | 1.54±0.04         | 1.82±0.0          | 0.00                                      |
| EHL-5S  | 8000                   | 2900                   | 2.76 | +++                 | 1.51±0.09         | 1.87±0.0          | 0.58±0.03                                 |
| EHL-10S | 8100                   | 2900                   | 2.79 | +++                 | 1.50±0.03         | 1.87±0.0          | 0.76±0.01                                 |
| EHL-20S | 8200                   | 3000                   | 2.73 | +++                 | 1.55±0.07         | 1.79±0.0          | 0.89±0.02                                 |
| EHL-40S | 8500                   | 3200                   | 2.65 | +++                 | 1.58±0.04         | 1.83±0.0          | 1.05±0.01                                 |
| EHL-60S | 8700                   | 4400                   | 1.98 | +++                 | 1.54±0.05         | 1.87±0.0          | 1.47±0.01                                 |
| LS      | 11000                  | 3900                   | 2.82 | +++                 | 1.86±0.24         | 2.18±0.0          | 2.21±0.02                                 |

<sup>a</sup>PDI = polydispersity index; +++ = fully dissolved in 10% (w/v) concentration; – = insoluble.

**Table S4** The elemental contents and contacts angle of EHL, EHL-XS and LS.

| <b>Samples</b> | <b>N%</b> | <b>C%</b> | <b>H%</b> | <b>S%</b> | <b>Contact angle</b> |
|----------------|-----------|-----------|-----------|-----------|----------------------|
| EHL            | 0.77      | 52.99     | 6.11      | 0.00      | 45°±1°               |
| EHL-5S         | 0.73      | 44.52     | 5.74      | 1.25      | 39°±1°               |
| EHL-10S        | 0.57      | 43.99     | 6.09      | 2.20      | 36°±2°               |
| EHL-20S        | 0.53      | 44.07     | 6.00      | 2.81      | 35°±2°               |
| EHL-40S        | 0.59      | 43.51     | 5.98      | 3.22      | 32°±1°               |
| EHL-60S        | 0.43      | 42.32     | 6.36      | 4.80      | 24°±2°               |
| LS             | 0.00      | 40.87     | 5.54      | 6.43      | 16°±2°               |

**Table S5** Viscoelastic parameters of the EHL-XS-based HIPEs, as determined by amplitude sweep tests at 1 Hz frequency.

| <b>Critical parameters</b> |                    |                     |              |                          |                    |
|----------------------------|--------------------|---------------------|--------------|--------------------------|--------------------|
| <b>EHL-XS<br/>wt%</b>      | <b>APG<br/>wt%</b> | <b>Oil<br/>vol%</b> | $\gamma_c$ % | $ \eta^* _{LVE}$<br>Pa.s | $\tan\delta_{LVE}$ |
| 0.5-5S                     | 3.5                | 80.0                | 0.16         | 80.82                    | 0.03               |
| 1.0-5S                     | 3.5                | 80.0                | 0.17         | 98.28                    | 0.03               |
| 2.0-5S                     | 3.5                | 80.0                | 0.12         | 28.22                    | 0.11               |
| 3.0-5S                     | 3.5                | 80.0                | 0.11         | 22.56                    | 0.12               |
| 0.5-10S                    | 3.5                | 80.0                | 0.17         | 105.40                   | 0.02               |
| 1.0-10S                    | 3.5                | 80.0                | 0.15         | 87.15                    | 0.03               |
| 2.0-10S                    | 3.5                | 80.0                | 0.12         | 43.18                    | 0.11               |
| 3.0-10S                    | 3.5                | 80.0                | 0.12         | 35.49                    | 0.12               |
| 0.5-20S                    | 3.5                | 80.0                | 0.20         | 115.00                   | 0.02               |
| 1.0-20S                    | 3.5                | 80.0                | 0.17         | 102.30                   | 0.03               |
| 2.0-20S                    | 3.5                | 80.0                | 0.12         | 97.57                    | 0.04               |
| 3.0-20S                    | 3.5                | 80.0                | 0.07         | 8.81                     | 0.46               |
| 0.5-40S                    | 3.5                | 80.0                | 0.16         | 91.04                    | 0.03               |
| 1.0-40S                    | 3.5                | 80.0                | 0.15         | 81.57                    | 0.02               |
| 2.0-40S                    | 3.5                | 80.0                | 0.11         | 76.42                    | 0.05               |
| 3.0-40S                    | 3.5                | 80.0                | 0.11         | 45.52                    | 0.08               |
| 0.5-60S                    | 3.5                | 80.0                | 0.15         | 82.98                    | 0.02               |
| 1.0-60S                    | 3.5                | 80.0                | 0.16         | 76.43                    | 0.02               |
| 2.0-60S                    | 3.5                | 80.0                | 0.10         | 37.45                    | 0.07               |
| 3.0-60S                    | 3.5                | 80.0                | 0.09         | 16.73                    | 0.11               |
| 2.0-20S                    | 3.5                | 75.0                | 0.05         | 53.74                    | 0.09               |
| 2.0-20S                    | 3.5                | 78.0                | 0.05         | 51.39                    | 0.07               |

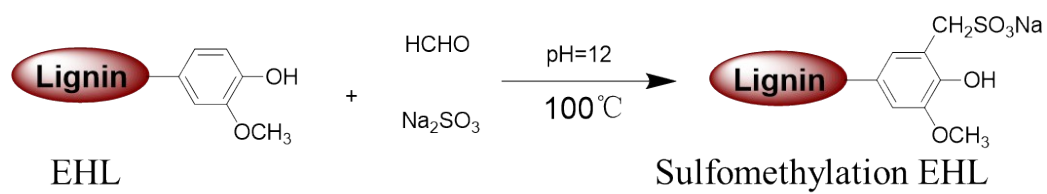

**Scheme. S1** The sulfomethylating modification of EHL.



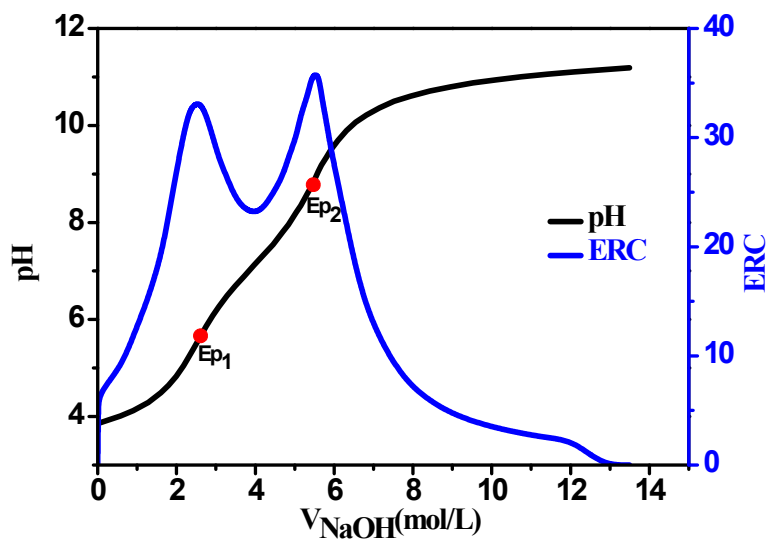

**Figure S1.** The diagrammatic curve of EHL by aqueous titration.

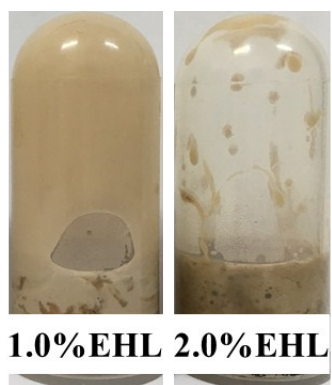

**Figure S2.** The appearances of the HIPEs stabilized by different EHL concentrations at 3.5 wt% APG, 80 vol% oil and water phase pH of 7.0.

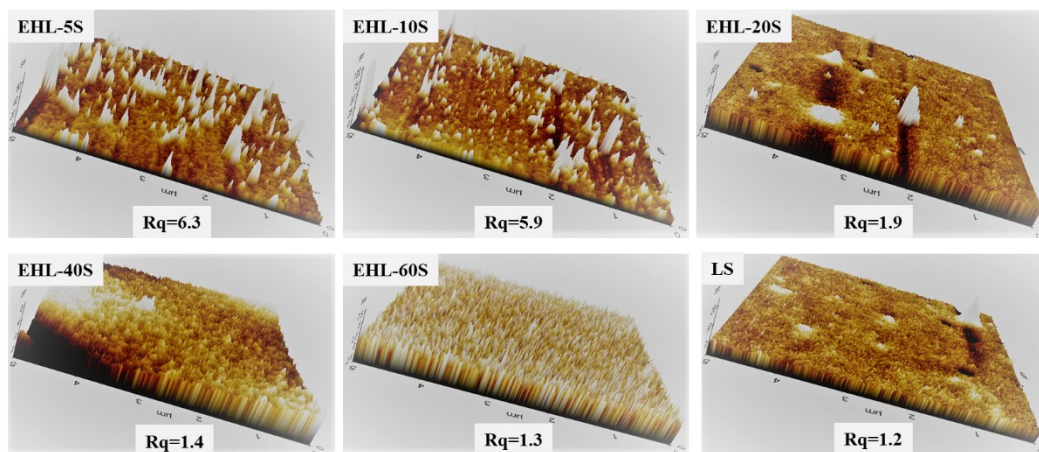

**Figure S3.** The topography images of EHL-XS with different sulfonation degrees and LS that coated on mica plates.

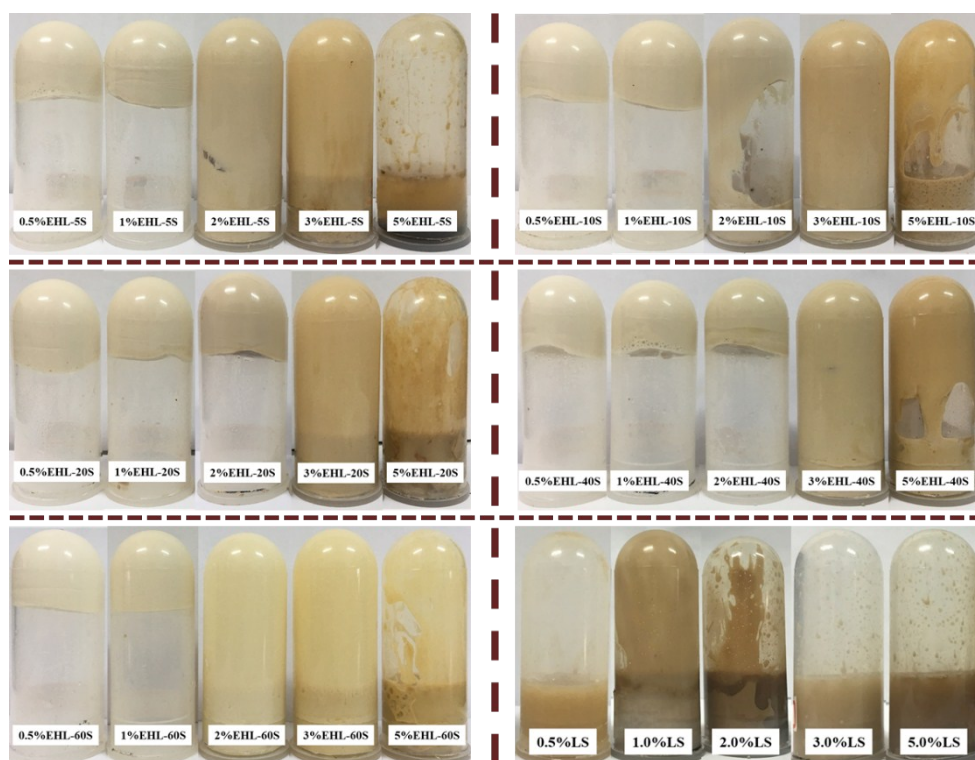

**Figure S4.** The appearances of the HIPEs stabilized by 0.5, 1, 3, 5wt% of EHL-XS (X=5, 10, 20, 40, 60) and LS at 3.5 wt% APG, 80 vol% oil and water phase pH of 6.75.

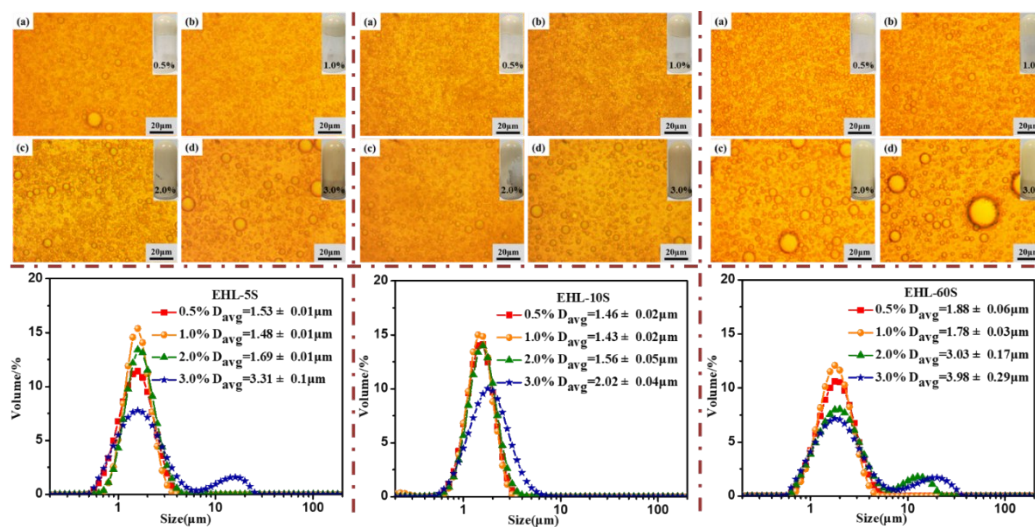

**Figure S5.** Optical microscope images and droplet size distributions of the HIPES stabilized by EHL-XS (X=5, 10, 60) with different concentrations at 3.5 wt% APG, 80 vol% oil and water phase pH of 6.75.

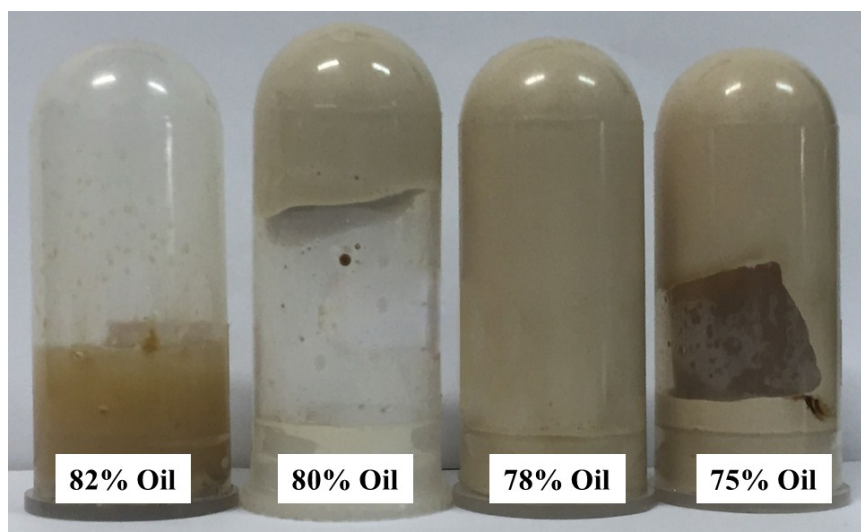

**Figure S6.** The appearances of the HIEPs stabilized by 2.0 wt% EHL-20S and 3.5 wt% APG with different internal phase volume fractions.

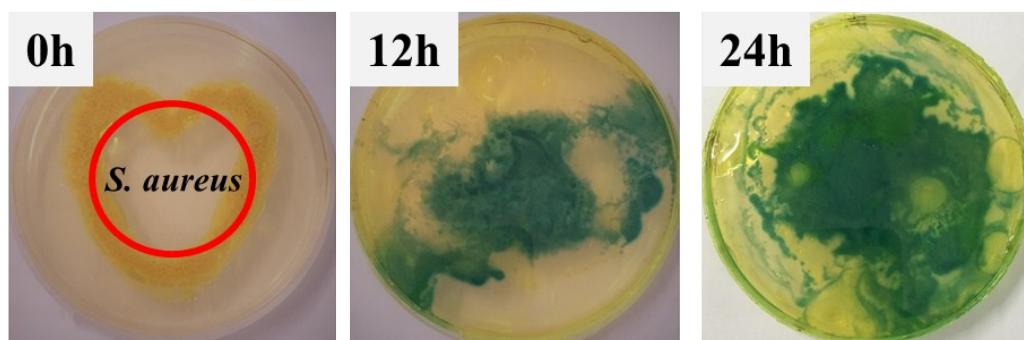

**Figure S7.** The growth of *S. aureus* with different incubation time in the presence of the HIPEs without curcumin.

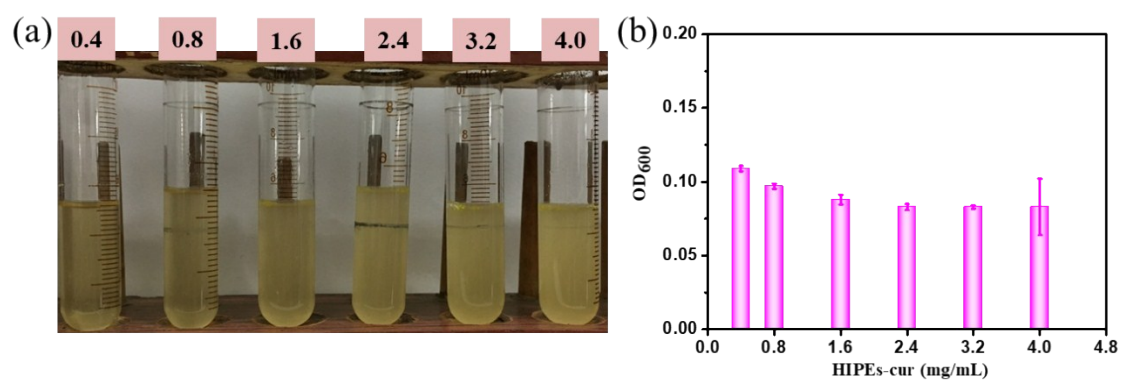

**Figure S8.** The appearances (a) and  $OD_{600}$  values (b) of suspensions with different concentrations of EHL-20S-based HIPEs-cur.
